# Supplementary material
Source: Springer Nature journal article supplement (https://www.springermedizin.de/resource/supplementary/12891_2005_176_MOESM1_ESM.pdf/9510714)

m. supraspinatus

m. vastus lateralis

Longitudinal scan

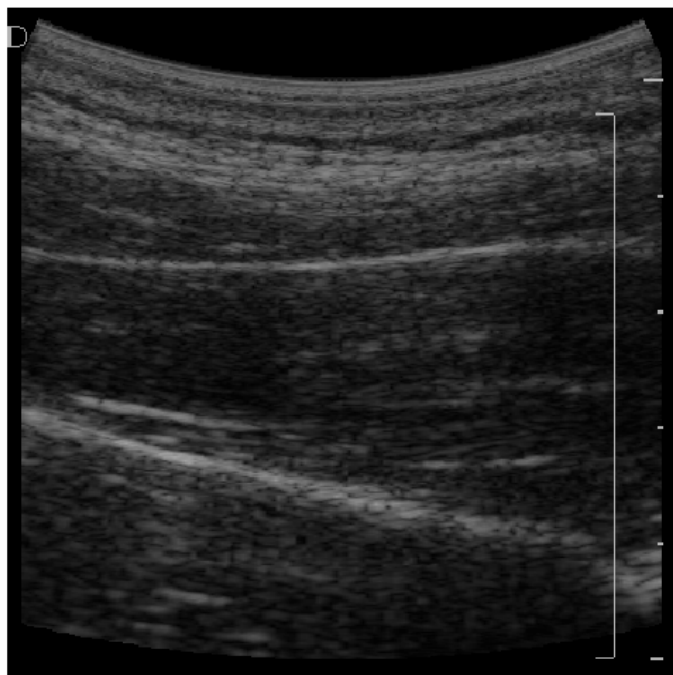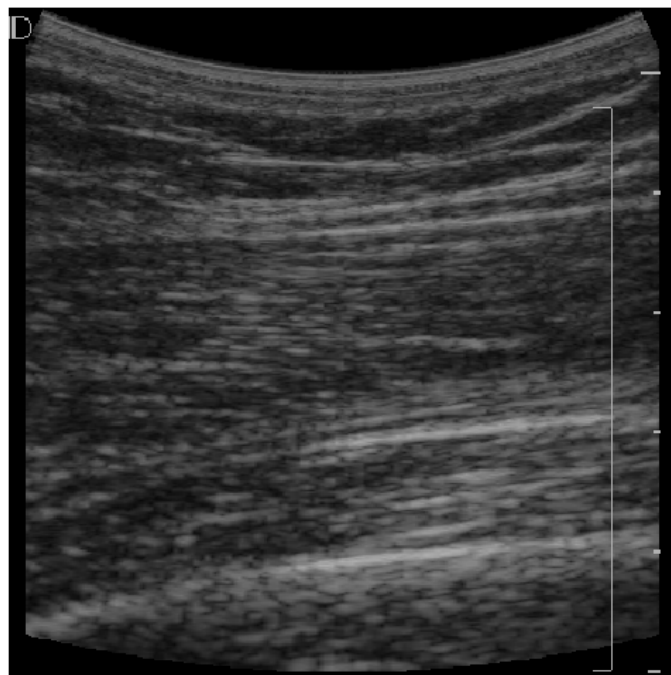

Transversal scan

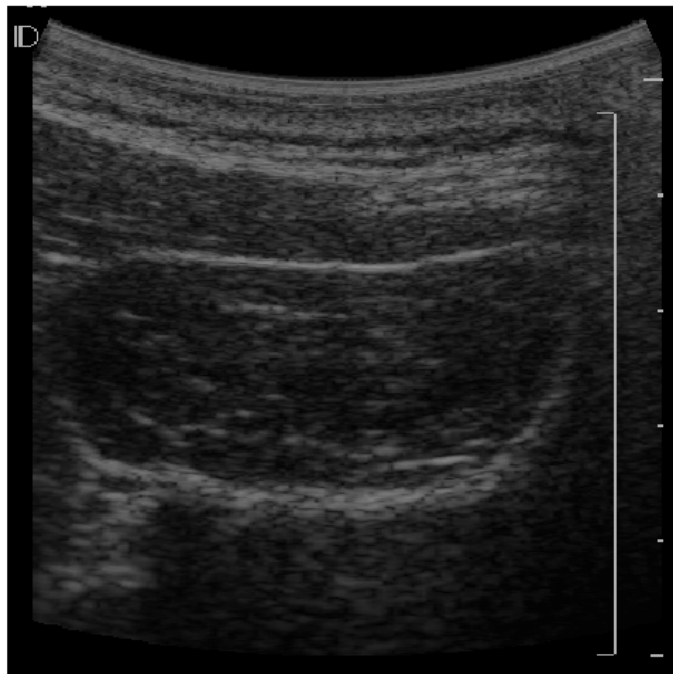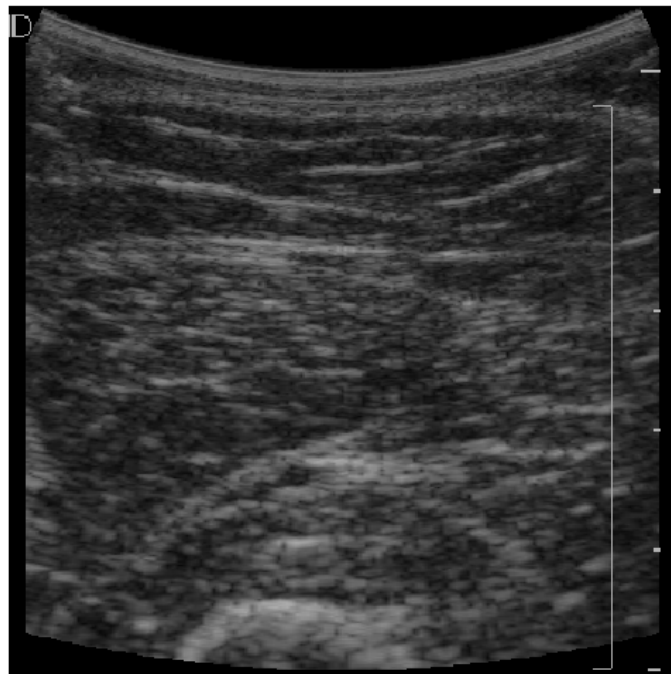

Supplement: MOESM1 [file 9510714]
